# Supplementary material for: Unraveling the role of gut microbiota and immune cells in thyroid cancer and tumor drug resistance
Source: PubMed Central journal article supplement — Discov Oncol. 2024 Nov 20;15:683. doi: 10.1007/s12672-024-01585-x (PMC11579266; doi:10.1007/s12672-024-01585-x), 2024-11-20
Supplement: 12672_2024_1585_MOESM1_ESM.pdf [file 12672_2024_1585_MOESM1_ESM.pdf]

# Supplementary Materia

## 1. MR test

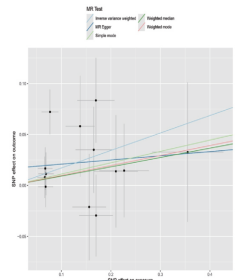

Figure S1 Scatter plot of SNPs associated with 5\_Hydroxytryptamine receptor 2A and their risk of thyroid cancer.

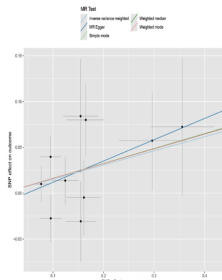

Figure S2 Scatter plot of SNPs associated with 5\_Methyltetrahydropterin and their risk of thyroid cancer.

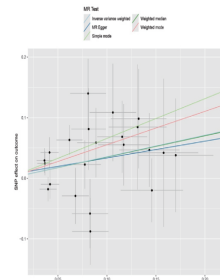

Figure S3 Scatter plot of SNPs associated with 1\_Phenylalanine and their risk of thyroid cancer.

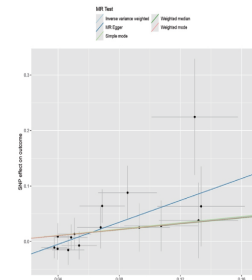

Figure S4 Scatter plot of SNPs associated with 4\_Saccharose and their risk of thyroid cancer.

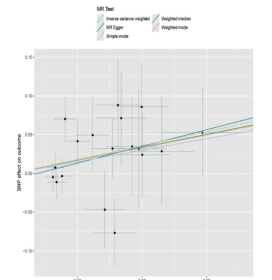

Figure S5 Scatter plot of SNPs associated with 4\_Beta-D-glucosaminase and their risk of thyroid cancer.

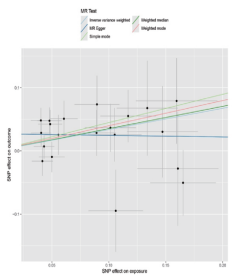

Figure S6 Scatter plot of SNPs associated with 1\_Catecholamine and their risk of thyroid cancer.

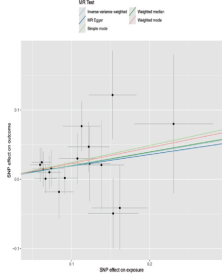

Figure S7 Scatter plot of SNPs associated with 1\_Glutathione and their risk of thyroid cancer.

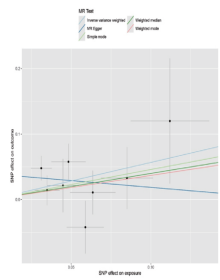

Figure S8 Scatter plot of SNPs associated with 1\_Biotinase C and their risk of thyroid cancer.

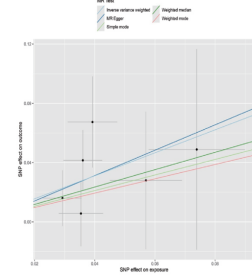

Figure S9 Scatter plot of SNPs associated with 1\_Myosin heavy chain and their risk of thyroid cancer.

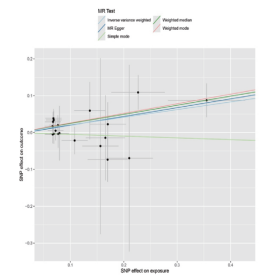

Figure S10 Scatter plot of SNPs associated with 1\_Nucleoside diphosphate and their risk of thyroid cancer.

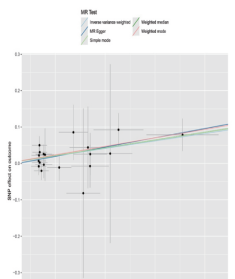

Figure S11 Scatter plot of SNPs associated with 1\_Nucleoside diphosphate and their risk of thyroid cancer.

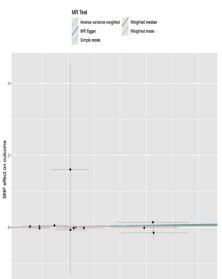

Figure S12 Scatter plot of SNPs associated with 1\_Monoclonal antibody and their risk of thyroid cancer.

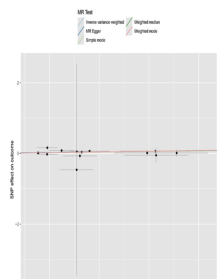

Figure S13 Scatter plot of SNPs associated with 1\_Monoclonal antibody and their risk of thyroid cancer.

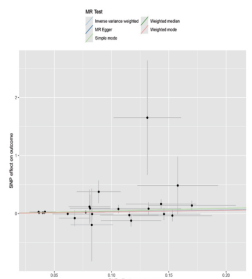

Figure S14 Scatter plot of SNPs associated with 1\_Phenylalanine and their risk of thyroid cancer.

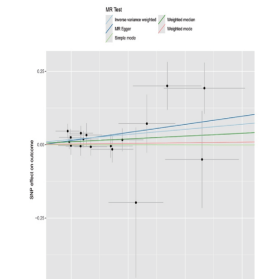

Figure S15 Scatter plot of SNPs associated with 4\_Saccharose and their risk of thyroid cancer.

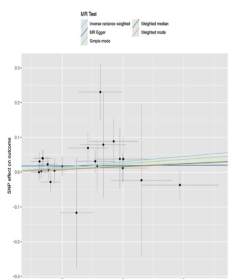

Figure S16 Scatter plot of SNPs associated with 1\_Diacylglycerol and their risk of thyroid cancer.

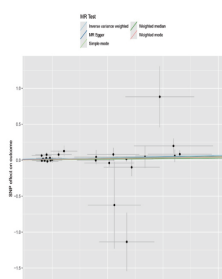

Figure S17 Scatter plot of SNPs associated with 1\_Amino acid and their risk of thyroid cancer.

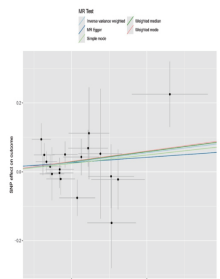

Figure S18 Scatter plot of SNPs associated with 1\_Glutathione and their risk of thyroid cancer.

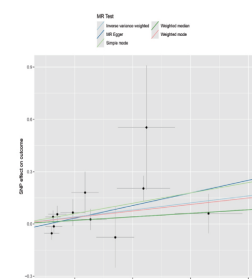

Figure S19 Scatter plot of SNPs associated with 1\_Biotinase C and their risk of thyroid cancer.

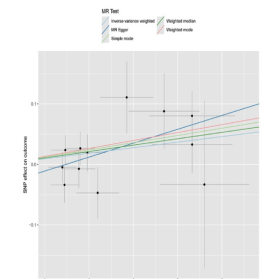

Figure S20 Scatter plot of SNPs associated with 1\_Myosin heavy chain and their risk of thyroid cancer.

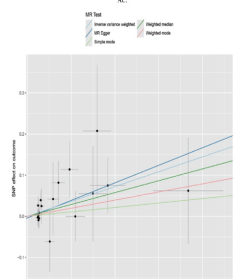

Figure S21 Scatter plot of SNPs associated with 1\_Nucleoside diphosphate and their risk of thyroid cancer.

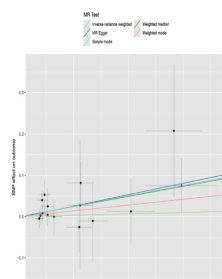

Figure S22 Scatter plot of SNPs associated with 1\_Glutathione and their risk of thyroid cancer.

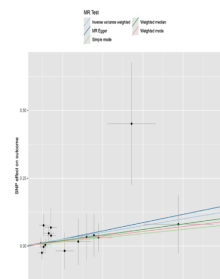

Figure S23 Scatter plot of SNPs associated with 1\_Glutathione and their risk of thyroid cancer.

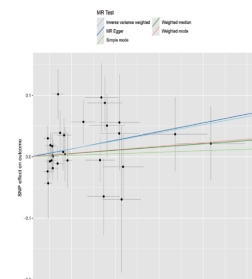

Figure S24 Scatter plot of SNPs associated with 1\_Biotinase C and their risk of thyroid cancer.

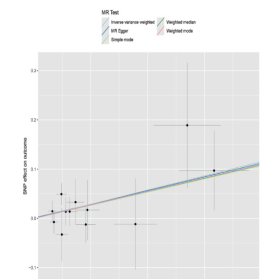

Figure S25 Scatter plot of SNPs associated with 1\_Myosin heavy chain and their risk of thyroid cancer.

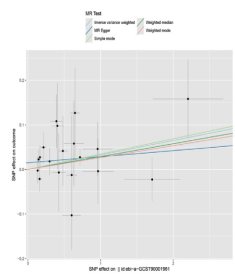

Figure S26 Scatter plot of SNPs associated with 1\_Nucleoside diphosphate and their risk of thyroid cancer.

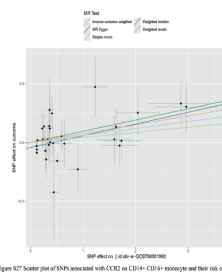

Figure S27 Scatter plot of SNPs associated with 1\_Glutathione and their risk of thyroid cancer.

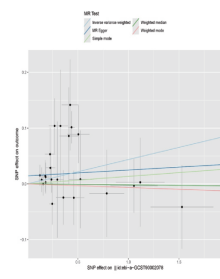

Figure S28 Scatter plot of SNPs associated with 1\_Biotinase C and their risk of thyroid cancer.

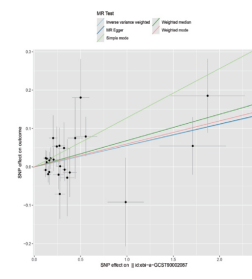

Figure S29 Scatter plot of SNPs associated with 1\_Myosin heavy chain and their risk of thyroid cancer.

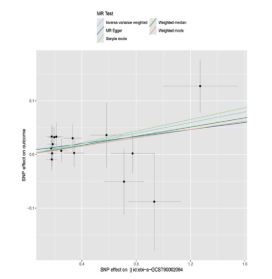

Figure S30 Scatter plot of SNPs associated with 1\_Nucleoside diphosphate and their risk of thyroid cancer.
