# Supplementary material for: Unraveling the role of gut microbiota and immune cells in thyroid cancer and tumor drug resistance
Source: PubMed Central journal article supplement — Discov Oncol. 2024 Nov 20;15:683. doi: 10.1007/s12672-024-01585-x (PMC11579266; doi:10.1007/s12672-024-01585-x), 2024-11-20
Supplement: 12672_2024_1585_MOESM2_ESM.pdf [file 12672_2024_1585_MOESM2_ESM.pdf]

## 2. MR Method

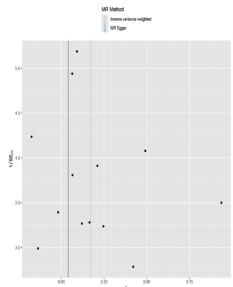

Figure T1 Funnel plot of SNPs associated with  $s\_Vitellogenin$  response and their risk of thyroid cancer.

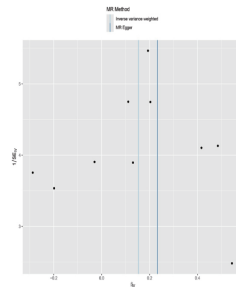

Figure T2 Funnel plot of SNPs associated with  $s\_Mammilonicobion$  and their risk of thyroid cancer.

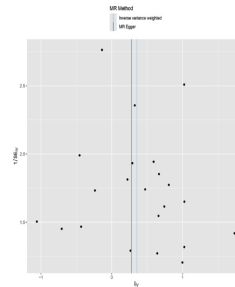

Figure T3 Funnel plot of SNPs associated with  $s\_Phoron\ translinens$  and their risk of thyroid cancer.

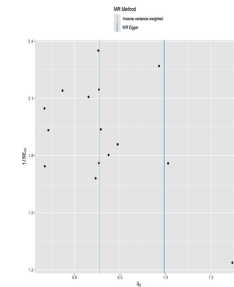

Figure T4 Funnel plot of SNPs associated with  $s\_Saccharomonos$  and their risk of thyroid cancer.

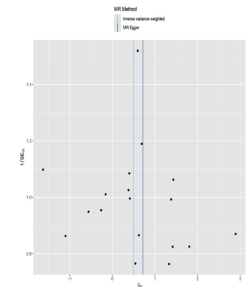

Figure T5 Funnel plot of SNPs associated with  $s\_Bacteroides\ stercoris$  and their risk of thyroid cancer.

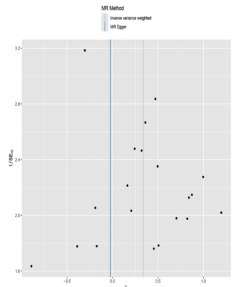

Figure T6 Funnel plot of SNPs associated with  $s\_Autochthonaceae$  and their risk of thyroid cancer.

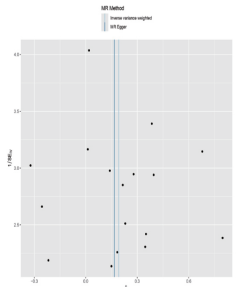

Figure T7 Funnel plot of SNPs associated with  $s\_LINC989MF$  and their risk of thyroid cancer.

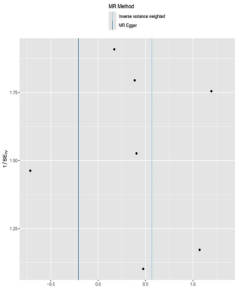

Figure T8 Funnel plot of SNPs associated with  $s\_Ruminococcus\ C$  and their risk of thyroid cancer.

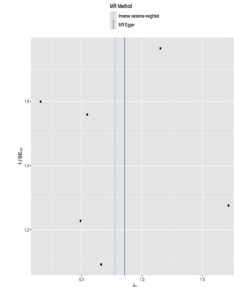

Figure T9 Funnel plot of SNPs associated with  $s\_Myobacteraceae$  and their risk of thyroid cancer.

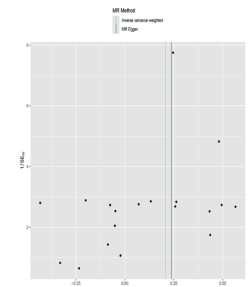

Figure T10 Funnel plot of SNPs associated with  $s\_Vallibacterium$  response and their risk of five more AC.

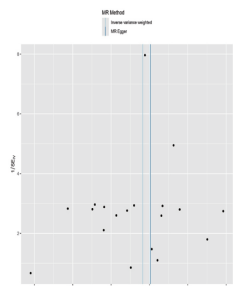

Figure T11 Funnel plot of SNPs associated with  $s\_Vallibacterium$  response and their risk of lgbp\_CDI4-AC.

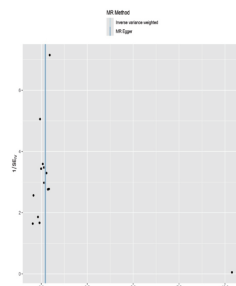

Figure T12 Funnel plot of SNPs associated with  $s\_Mammilonicobion$  and their risk of B cell lymphocyte.

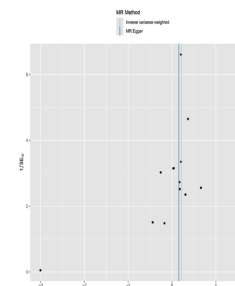

Figure T13 Funnel plot of SNPs associated with  $s\_Mammilonicobion$  and their risk of SSC-A on granulocyte.

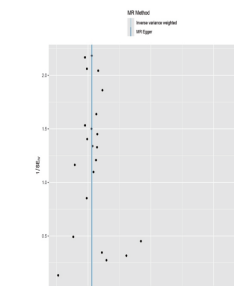

Figure T14 Funnel plot of SNPs associated with  $s\_Phoron\ translinens$  and their risk of CCR2 on CD14+ CD4.

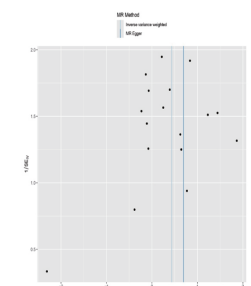

Figure T15 Funnel plot of SNPs associated with  $s\_Saccharomonos$  and their risk of FEM DN (CD4-CD8).

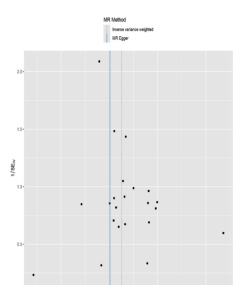

Figure T16 Funnel plot of SNPs associated with  $s\_Bacteroides\ stercoris$  and their risk of CD38+ DN (CD4-CD8) AC.

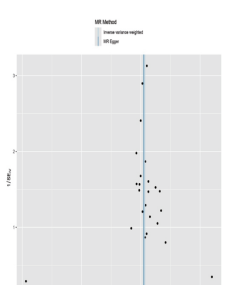

Figure T17 Funnel plot of SNPs associated with  $s\_Autochthonaceae$  and their risk of CD1+ on myeloid DC.

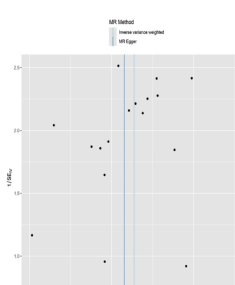

Figure T18 Funnel plot of SNPs associated with  $s\_LINC989MF$  and their risk of CD39+ CD4+.

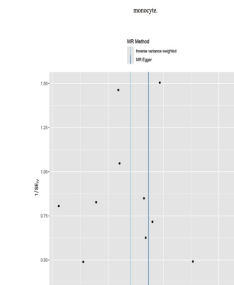

Figure T19 Funnel plot of SNPs associated with  $s\_Ruminococcus\ C$  and their risk of CD11b on Mo-MDC.

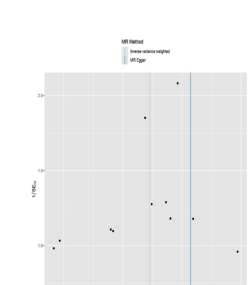

Figure T20 Funnel plot of SNPs associated with  $s\_Myobacteraceae$  and their risk of B cell lymphocyte.

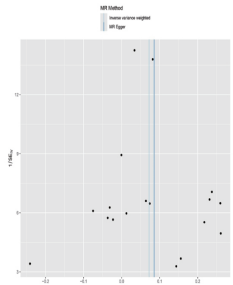

Figure T21 Funnel plot of SNPs associated with five more AC and their risk of thyroid cancer.

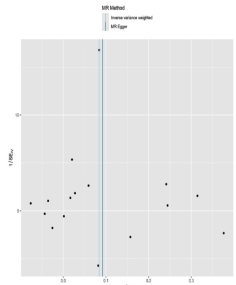

Figure T22 Funnel plot of SNPs associated with lgbp\_CDI4-AC and their risk of thyroid cancer.

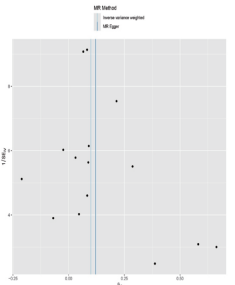

Figure T23 Funnel plot of SNPs associated with EM DN (CD4-CD8) AC and their risk of thyroid cancer.

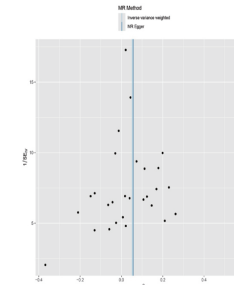

Figure T24 Funnel plot of SNPs associated with B cell lymphocyte and their risk of thyroid cancer.

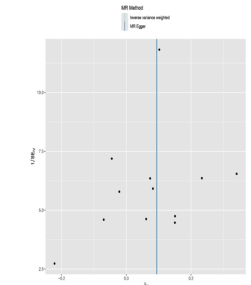

Figure T25 Funnel plot of SNPs associated with CD38+ DN (CD4-CD8) AC and their risk of thyroid cancer.

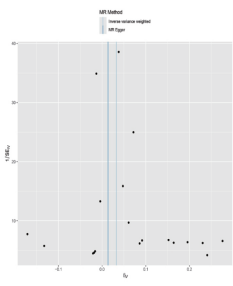

Figure T26 Funnel plot of SNPs associated with CD32+ CD39+ CD34+ and their risk of thyroid cancer.

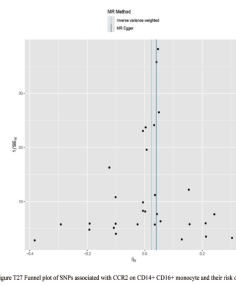

Figure T27 Funnel plot of SNPs associated with CCR2 on CD14+ CD16+ monocyte and their risk of thyroid cancer.

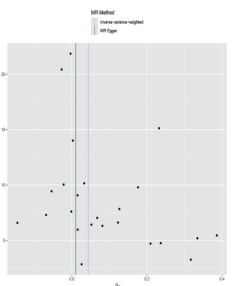

Figure T28 Funnel plot of SNPs associated with SSC-A on granulocyte.

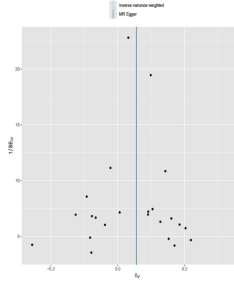

Figure T29 Funnel plot of SNPs associated with CD11c on myeloid DC and their risk of thyroid cancer.

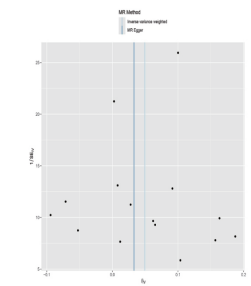

Figure T30 Funnel plot of SNPs associated with CD11b on Mo-MDC and their risk of thyroid cancer.
