# Supplementary material for: Unraveling the role of gut microbiota and immune cells in thyroid cancer and tumor drug resistance
Source: PubMed Central journal article supplement — Discov Oncol. 2024 Nov 20;15:683. doi: 10.1007/s12672-024-01585-x (PMC11579266; doi:10.1007/s12672-024-01585-x), 2024-11-20
Supplement: 12672_2024_1585_MOESM3_ESM.pdf [file 12672_2024_1585_MOESM3_ESM.pdf]

### 3.MR leave-one-out

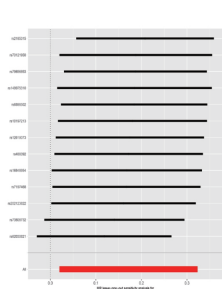

Figure U1 MR leave-one-out sensitivity analysis for 'a' Yellowish orange on thyroid cancer.

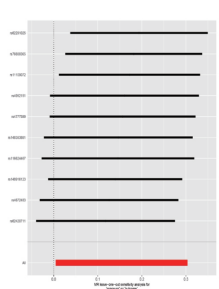

Figure U2 MR leave-one-out sensitivity analysis for 'b' Mushrooms on thyroid cancer.

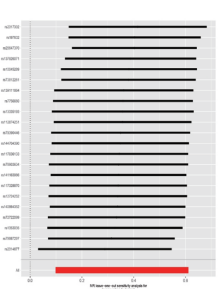

Figure U3 MR leave-one-out sensitivity analysis for 'c' Peach marmalade on thyroid cancer.

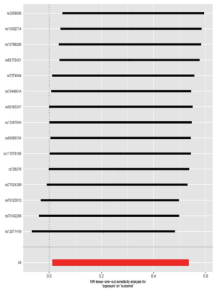

Figure U4 MR leave-one-out sensitivity analysis for 'g' Sacharomyces on thyroid cancer.

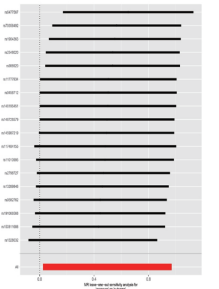

Figure U5 MR leave-one-out sensitivity analysis for 'i' Bacteroides animalis on thyroid cancer.

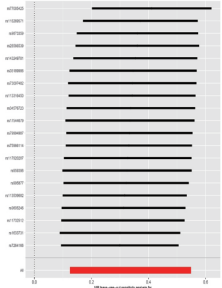

Figure U6 MR leave-one-out sensitivity analysis for 'l' Acetabacterium on thyroid cancer.

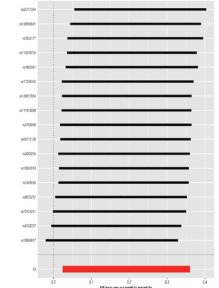

Figure U7 MR leave-one-out sensitivity analysis for 'n' LINC00667 on thyroid cancer.

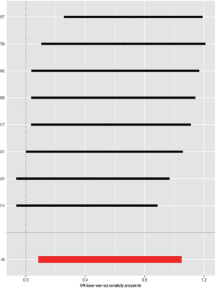

Figure U8 MR leave-one-out sensitivity analysis for 's' Bacteriococcus C on thyroid cancer.

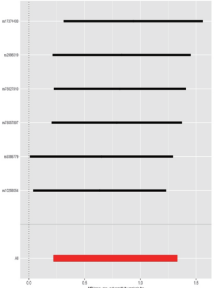

Figure U9 MR leave-one-out sensitivity analysis for 't' Myobacterium on thyroid cancer.

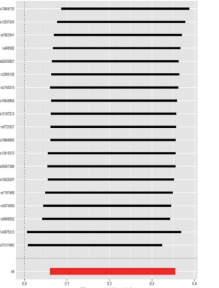

Figure U10 MR leave-one-out sensitivity analysis for 'v' Yellowish orange on Sw even AC.

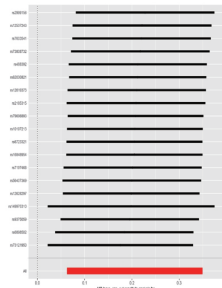

Figure U11 MR leave-one-out sensitivity analysis for 'a' Yellowish orange on CD34+ DN (CD4+CD8) AC.

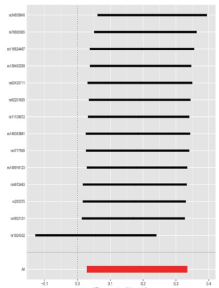

Figure U12 MR leave-one-out sensitivity analysis for 'c' Mushrooms on B cell Nymphocyte.

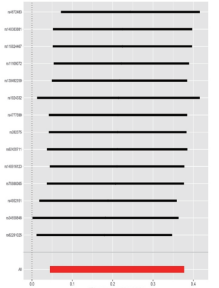

Figure U13 MR leave-one-out sensitivity analysis for 'g' Mushrooms on SSC-A on granulocyte.

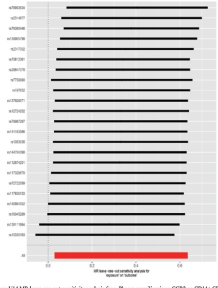

Figure U14 MR leave-one-out sensitivity analysis for 'p' Peach marmalade on CD3+ CD14+ CD16+ monocyte.

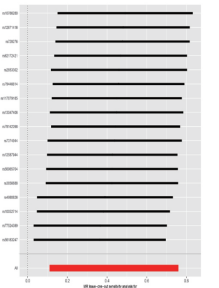

Figure U15 MR leave-one-out sensitivity analysis for 'g' Sacharomyces on DN DN (CD4+CD8) AC.

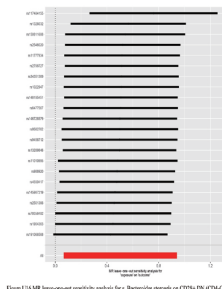

Figure U16 MR leave-one-out sensitivity analysis for 'i' Bacteroides animalis on CD34+ DN (CD4+CD8) AC.

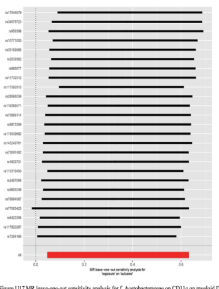

Figure U17 MR leave-one-out sensitivity analysis for 'l' Acetabacterium on CD11c on myeloid DC.

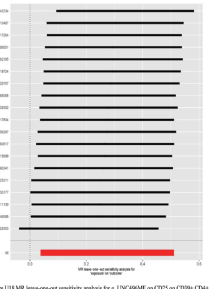

Figure U18 MR leave-one-out sensitivity analysis for 'n' LINC00667 on CD2 on CD3+ CD4+.

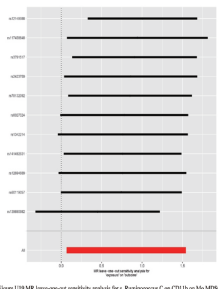

Figure U19 MR leave-one-out sensitivity analysis for 's' Bacteriococcus C on CD11c on MoMDC.

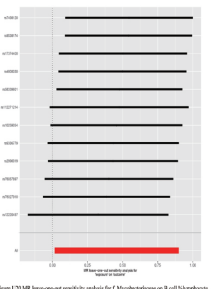

Figure U20 MR leave-one-out sensitivity analysis for 't' Myobacterium on B cell Nymphocyte.

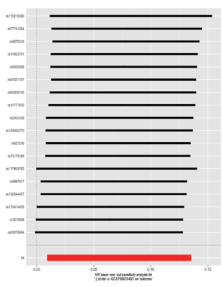

Figure U21 MR leave-one-out sensitivity analysis for 'v' Sw even AC on thyroid cancer.

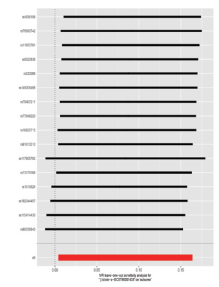

Figure U22 MR leave-one-out sensitivity analysis for 'i' Bacteroides animalis on CD34+ DN (CD4+CD8) AC on thyroid cancer.

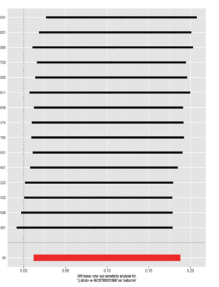

Figure U23 MR leave-one-out sensitivity analysis for 'n' LINC00667 on EM DN (CD4+CD8) AC on thyroid cancer.

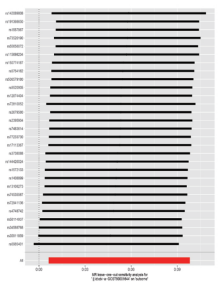

Figure U24 MR leave-one-out sensitivity analysis for 's' Bacteriococcus C on CD11c on myeloid DC on thyroid cancer.

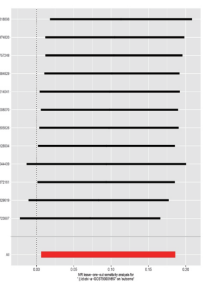

Figure U25 MR leave-one-out sensitivity analysis for 't' Myobacterium on CD34+ DN (CD4+CD8) AC on thyroid cancer.

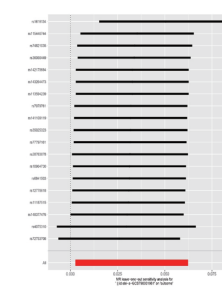

Figure U26 MR leave-one-out sensitivity analysis for 'v' Yellowish orange on CD32 on CD3+ CD8+ AC on thyroid cancer.

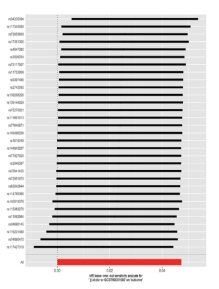

Figure U27 MR leave-one-out sensitivity analysis for 'i' Bacteroides animalis on CD34+ CD14+ monocyte on thyroid cancer.

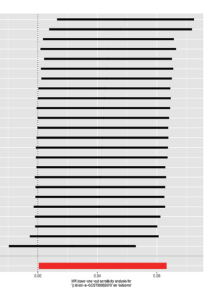

Figure U28 MR leave-one-out sensitivity analysis for 'n' LINC00667 on SSC-A on granulocyte on thyroid cancer.

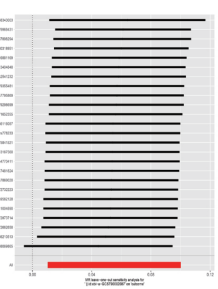

Figure U29 MR leave-one-out sensitivity analysis for 's' Bacteriococcus C on CD11c on myeloid DC on thyroid cancer.

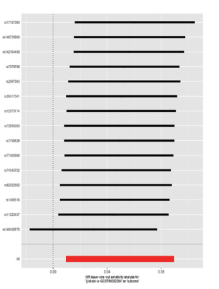

Figure U30 MR leave-one-out sensitivity analysis for 't' Myobacterium on CD11c on MoMDC on thyroid cancer.
